# Supplementary material
Source: PubMed Central journal article supplement (PMC3298760)
Supplement: NIHMS326237-supplement-S1.pdf [file NIHMS326237-supplement-S1.pdf]

Table S1. Clinical Characteristics of KEEP Participants, 2000- 2009, by Estimated Glomerular Filtration Rate Categories Defined by the Modification of Diet in Renal Disease Study Equation

| <i>n</i> (row percent)                | All, <i>n</i> | MDRD Study eGFR, mL/min/1.73 m <sup>2</sup> |               |               |               |             |            |
|---------------------------------------|---------------|---------------------------------------------|---------------|---------------|---------------|-------------|------------|
|                                       |               | ≥ 120                                       | 90-119        | 60-89         | 45-59         | 30-44       | < 30       |
|                                       | 116,321       | 5392 (4.6)                                  | 31,080 (26.7) | 60,303 (51.8) | 14,075 (12.1) | 4422 (3.8)  | 1049 (0.9) |
| Age, yr                               |               |                                             |               |               |               |             |            |
| 18-30                                 | 8263          | 1628 (30.2)                                 | 4102 (13.2)   | 2389 (4.0)    | 108 (0.8)     | 21 (0.8)    | 15 (0.5)   |
| 31-45                                 | 23,165        | 2029 (37.6)                                 | 9005 (29.0)   | 11,027 (18.3) | 935 (6.6)     | 114 (2.6)   | 55 (5.2)   |
| 46-60                                 | 40,633        | 1261 (23.4)                                 | 12,422 (40.0) | 22,380 (37.1) | 3663 (26.0)   | 708 (16.0)  | 199 (19.0) |
| 61-75                                 | 33,156        | 412 (7.6)                                   | 4876 (15.7)   | 19,229 (31.9) | 6310 (44.8)   | 1917 (43.3) | 412 (39.3) |
| > 75                                  | 11,104        | 62 (1.2)                                    | 675 (2.2)     | 5278 (8.7)    | 3059 (21.7)   | 1662 (37.6) | 368 (35.1) |
| Sex                                   |               |                                             |               |               |               |             |            |
| Men                                   | 37,160        | 1380 (25.6)                                 | 9697 (31.2)   | 20,264 (33.6) | 4164 (29.6)   | 1273 (28.8) | 382 (36.4) |
| Women                                 | 79,161        | 4012 (74.4)                                 | 21,383 (68.8) | 40,039 (66.4) | 9911 (70.4)   | 3149 (71.2) | 667 (63.6) |
| Race                                  |               |                                             |               |               |               |             |            |
| White                                 | 57,355        | 1277 (23.7)                                 | 11,293 (36.3) | 32,035 (53.1) | 9140 (64.9)   | 3000 (67.8) | 610 (58.2) |
| African American                      | 38,521        | 2661 (49.3)                                 | 13,023 (41.9) | 18,516 (30.7) | 3168 (22.5)   | 895 (20.2)  | 258 (24.6) |
| Other                                 | 20,445        | 1454 (27.0)                                 | 6764 (21.8)   | 9752 (16.2)   | 1767 (12.6)   | 527 (11.9)  | 181 (17.2) |
| Self-reported conditions <sup>a</sup> |               |                                             |               |               |               |             |            |
| Diabetes                              | 34,283        | 1329 (24.9)                                 | 8118 (26.3)   | 17,093 (28.5) | 5110 (36.5)   | 2093 (47.5) | 540 (51.7) |
| Hypertension                          | 65,340        | 1926 (36.1)                                 | 14,078 (45.6) | 34,174 (57.1) | 10,367 (74.1) | 3836 (87.2) | 959 (91.9) |
| Coronary artery disease               | 10,104        | 175 (3.3)                                   | 1593 (5.1)    | 5042 (8.4)    | 2030 (14.4)   | 1009 (22.8) | 255 (24.3) |
| Congestive heart failure              | 2455          | 63 (2.2)                                    | 418 (2.3)     | 1170 (3.2)    | 454 (5.4)     | 263 (9.8)   | 87 (14.6)  |
| Cerebrovascular disease               | 5643          | 155 (3.0)                                   | 950 (3.2)     | 2858 (5.0)    | 1018 (7.7)    | 506 (12.3)  | 156 (15.6) |
| Peripheral vascular disease           | 4644          | 199 (3.7)                                   | 1055 (3.4)    | 2182 (3.6)    | 776 (5.5)     | 316 (7.2)   | 116 (11.1) |
| WHO anemia <sup>b</sup>               | 13,839        | 944 (17.8)                                  | 3392 (11.1)   | 5539 (9.3)    | 1984 (14.3)   | 1370 (31.5) | 610 (59.5) |

Note: Values are *n* (column percent) unless otherwise indicated. Conversion factor for eGFR in mL/min/1.73 m<sup>2</sup> to mL/s/1.73 m<sup>2</sup> x 0.01667. eGFR, estimated glomerular filtration rate; KEEP, Kidney Early Evaluation Program; MDRD, Modification of Diet in Renal Disease; WHO World Health Organization.

<sup>a</sup> Diabetes includes self-reported diabetes and taking medication; hypertension includes self-reported hypertension and taking medication; coronary artery disease includes history of heart attack, coronary artery bypass graft, angioplasty, and coronary artery disease; congestive heart failure data available starting 2005; cerebrovascular disease is defined as stroke; peripheral vascular disease includes peripheral vascular disease for 2000-2004 and limb amputation for 2005-2009.

<sup>b</sup> Defined as hemoglobin < 13 g/dL for men and < 12 g/dL for women.
