# Supplementary material
Source: PubMed Central journal article supplement (PMC3298760)
Supplement: NIHMS326237-supplement-S2.pdf [file NIHMS326237-supplement-S2.pdf]

Table S2. Characteristics of KEEP Participants by Estimated Glomerular Filtration Rate Categories Defined by the Modification of Diet in Renal Disease Study and Chronic Kidney Disease Epidemiology Collaboration Equations

| MDRD Study eGFR,<br>mL/min/1.73m <sup>2</sup> | CKD-EPI eGFR, mL/min/1.73m <sup>2</sup> |      |          |      |          |      |          |       |          |      |          |      |          |   |
|-----------------------------------------------|-----------------------------------------|------|----------|------|----------|------|----------|-------|----------|------|----------|------|----------|---|
|                                               | All                                     |      | ≥ 120    |      | 90-119   |      | 60-89    |       | 45-59    |      | 30-44    |      | < 30     |   |
|                                               | <i>n</i>                                | %    | <i>n</i> | %    | <i>n</i> | %    | <i>n</i> | %     | <i>n</i> | %    | <i>n</i> | %    | <i>n</i> | % |
| All                                           | 116,321                                 |      | 6827     |      | 42,469   |      | 50,412   |       | 11,261   |      | 4234     |      | 1118     |   |
| ≥ 120                                         |                                         |      |          |      |          |      |          |       |          |      |          |      |          |   |
| <i>n</i>                                      | 5392                                    |      | 3897     |      | 1489     |      | 6        |       |          |      |          |      |          |   |
| Age (mean, yrs)                               | -                                       | 39.6 | -        | 33.8 | -        | 54.6 | -        | 91.8  |          |      |          |      |          |   |
| Women                                         | 4012                                    | 74.4 | 3020     | 77.5 | 553      | 66.2 | 6        | 100.0 |          |      |          |      |          |   |
| White                                         | 1277                                    | 23.7 | 720      | 18.5 | 406      | 37.1 | 4        | 66.7  |          |      |          |      |          |   |
| African American                              | 2661                                    | 49.3 | 2254     | 57.8 | 530      | 27.3 | 1        | 16.7  |          |      |          |      |          |   |
| Other race                                    | 1454                                    | 27.0 | 923      | 23.7 | 1489     | 35.6 | 1        | 16.6  |          |      |          |      |          |   |
| 90-119                                        |                                         |      |          |      |          |      |          |       |          |      |          |      |          |   |
| <i>n</i>                                      | 31,080                                  |      | 2930     |      | 27,464   |      | 686      |       |          |      |          |      |          |   |
| Age (mean, yrs)                               | -                                       | 47.7 | -        | 32.1 | -        | 48.6 | -        | 77.6  |          |      |          |      |          |   |
| Women                                         | 21,383                                  | 68.8 | 2361     | 80.6 | 18,687   | 68.0 | 335      | 48.8  |          |      |          |      |          |   |
| White                                         | 11,293                                  | 36.3 | 603      | 20.6 | 10,186   | 37.1 | 504      | 73.5  |          |      |          |      |          |   |
| African American                              | 13,023                                  | 41.9 | 1826     | 62.3 | 11,089   | 40.4 | 108      | 15.7  |          |      |          |      |          |   |
| Other race                                    | 6764                                    | 21.8 | 501      | 17.1 | 6189     | 22.5 | 74       | 10.8  |          |      |          |      |          |   |
| 60-89                                         |                                         |      |          |      |          |      |          |       |          |      |          |      |          |   |
| <i>n</i>                                      | 60303                                   |      |          |      | 13516    |      | 46,282   |       | 505      |      |          |      |          |   |
| Age (mean, yrs)                               | -                                       | 56.5 |          |      | -        | 45.8 | -        | 59.4  | -        | 80.5 |          |      |          |   |
| Women                                         | 40039                                   | 66.4 |          |      | 9671     | 71.5 | 30,106   | 65.0  | 262      | 51.9 |          |      |          |   |
| White                                         | 32035                                   | 53.1 |          |      | 6938     | 51.3 | 24,893   | 53.8  | 204      | 40.4 |          |      |          |   |
| African American                              | 18516                                   | 30.7 |          |      | 3391     | 25.1 | 14,843   | 32.1  | 282      | 55.8 |          |      |          |   |
| Other race                                    | 9752                                    | 16.2 |          |      | 3187     | 23.6 | 6546     | 14.1  | 19       | 3.8  |          |      |          |   |
| 45-59                                         |                                         |      |          |      |          |      |          |       |          |      |          |      |          |   |
| <i>n</i>                                      | 14,075                                  |      |          |      |          |      | 3438     |       | 10,333   |      | 304      |      |          |   |
| Age (mean, yrs)                               | -                                       | 65.0 |          |      |          |      | -        | 55.0  | -        | 67.9 | -        | 80.5 |          |   |
| Women                                         | 9911                                    | 70.4 |          |      |          |      | 2675     | 77.8  | 7054     | 68.3 | 182      | 59.9 |          |   |
| White                                         | 9140                                    | 64.9 |          |      |          |      | 2412     | 70.2  | 6621     | 64.1 | 107      | 35.2 |          |   |
| African American                              | 3168                                    | 22.5 |          |      |          |      | 426      | 12.4  | 2567     | 24.8 | 175      | 57.6 |          |   |
| Other race                                    | 1767                                    | 12.6 |          |      |          |      | 600      | 17.4  | 1145     | 11.1 | 22       | 7.2  |          |   |
| 30-44                                         |                                         |      |          |      |          |      |          |       |          |      |          |      |          |   |
| <i>n</i>                                      | 4422                                    |      |          |      |          |      |          |       | 423      |      | 3882     |      | 117      |   |

Supplementary Table S2; Stevens et al, AJKD, "Comparison of the CKD Epidemiology Collaboration (CKD-EPI) and Modification of Diet in Renal Disease (MDRD) Study Equations: Risk Factors for and Complications of CKD and Mortality in the Kidney Early Evaluation Program (KEEP)"

|                  |      |      |     |      |      |      |      |      |
|------------------|------|------|-----|------|------|------|------|------|
| Age (mean, yrs)  | -    | 70.5 | -   | 56.1 | -    | 71.7 | 117  | 81.0 |
| Women            | 3149 | 71.2 | 353 | 83.4 | 2730 | 70.3 | 66   | 56.4 |
| White            | 3000 | 67.8 | 305 | 72.1 | 2630 | 67.7 | 65   | 55.5 |
| African American | 895  | 20.2 | 29  | 6.9  | 819  | 21.1 | 47   | 40.2 |
| Other race       | 527  | 11.9 | 89  | 21.0 | 433  | 11.2 | 5    | 4.3  |
| < 30             |      |      |     |      |      |      |      |      |
| <i>n</i>         | 1049 |      |     |      | 48   |      | 1001 |      |
| Age (mean, yrs)  | -    | 68.5 |     |      | -    | 56.1 | -    | 69.1 |
| Women            | 667  | 63.6 |     |      | 39   | 81.2 | 628  | 62.7 |
| White            | 610  | 58.1 |     |      | 33   | 68.8 | 577  | 57.6 |
| African American | 258  | 24.6 |     |      | 5    | 10.4 | 253  | 25.3 |
| Other race       | 181  | 17.3 |     |      | 10   | 20.8 | 171  | 17.1 |

Note: All *n*'s are total; values are missing in each category. Conversion factor for eGFR in mL/min/1.73 m<sup>2</sup> to mL/s/1.73 m<sup>2</sup> x 0.01667.

CKD-EPI, Chronic Kidney Disease Epidemiology Collaborative; eGFR, estimated glomerular filtration rate; KEEP, Kidney Early Evaluation Program; MDRD, Modification of Diet in Renal Disease.
